# Supplementary material
Source: publisher figshare collection journal article supplement (https://acs.figshare.com/ndownloader/files/4375723)
Supplement: Supplementary file 1 [file 4375723]

data_liu27

 

_audit_creation_method            SHELXLTL

_chemical_name_systematic

;

 ?

;

_chemical_name_common             ?

_chemical_melting_point           ?

_chemical_formula_moiety          ?

_chemical_formula_sum

 'C12 H14 B F3 N2 O4 S'

_chemical_formula_weight          350.12

 

loop_

 _atom_type_symbol

 _atom_type_description

 _atom_type_scat_dispersion_real

 _atom_type_scat_dispersion_imag

 _atom_type_scat_source

 'C'  'C'   0.0033   0.0016

 'International Tables Vol C Tables 4.2.6.8 and 6.1.1.4'

 'H'  'H'   0.0000   0.0000

 'International Tables Vol C Tables 4.2.6.8 and 6.1.1.4'

 'B'  'B'   0.0013   0.0007

 'International Tables Vol C Tables 4.2.6.8 and 6.1.1.4'

 'N'  'N'   0.0061   0.0033

 'International Tables Vol C Tables 4.2.6.8 and 6.1.1.4'

 'O'  'O'   0.0106   0.0060

 'International Tables Vol C Tables 4.2.6.8 and 6.1.1.4'

 'F'  'F'   0.0171   0.0103

 'International Tables Vol C Tables 4.2.6.8 and 6.1.1.4'

 'S'  'S'   0.1246   0.1234

 'International Tables Vol C Tables 4.2.6.8 and 6.1.1.4'

 

_symmetry_cell_setting            Monoclinic

_symmetry_space_group_name_H-M    P2(1)/c

 

loop_

 _symmetry_equiv_pos_as_xyz

 'x, y, z'

 '-x, y+1/2, -z+1/2'

 '-x, -y, -z'

 'x, -y-1/2, z-1/2'

 

_cell_length_a                    9.6415(13)

_cell_length_b                    9.9617(14)

_cell_length_c                    16.668(2)

_cell_angle_alpha                 90.00

_cell_angle_beta                  96.612(2)

_cell_angle_gamma                 90.00

_cell_volume                      1590.3(4)

_cell_formula_units_Z             4

_cell_measurement_temperature     173(2)

_cell_measurement_reflns_used     2705

_cell_measurement_theta_min       2.39

_cell_measurement_theta_max       22.25

 

_exptl_crystal_description        block

_exptl_crystal_colour             colorless

_exptl_crystal_size_max           0.32

_exptl_crystal_size_mid           0.26

_exptl_crystal_size_min           0.18

_exptl_crystal_density_meas       ?

_exptl_crystal_density_diffrn     1.462

_exptl_crystal_density_method     'not measured'

_exptl_crystal_F_000              720

_exptl_absorpt_coefficient_mu     0.254

_exptl_absorpt_correction_type    'multi-scan'

_exptl_absorpt_correction_T_min   0.9232

_exptl_absorpt_correction_T_max   0.9557

_exptl_absorpt_process_details    SADABS

 

_exptl_special_details

;

 ?

;

 

_diffrn_ambient_temperature       173(2)

_diffrn_radiation_wavelength      0.71073

_diffrn_radiation_type            MoK\a

_diffrn_radiation_source          'fine-focus sealed tube'

_diffrn_radiation_monochromator   graphite

_diffrn_measurement_device_type   'CCD area detector'

_diffrn_measurement_method        'phi and omega scans'

_diffrn_detector_area_resol_mean  ?

_diffrn_standards_number          ?

_diffrn_standards_interval_count  ?

_diffrn_standards_interval_time   ?

_diffrn_standards_decay_%         ?

_diffrn_reflns_number             14940

_diffrn_reflns_av_R_equivalents   0.0393

_diffrn_reflns_av_sigmaI/netI     0.0358

_diffrn_reflns_limit_h_min        -12

_diffrn_reflns_limit_h_max        12

_diffrn_reflns_limit_k_min        -12

_diffrn_reflns_limit_k_max        12

_diffrn_reflns_limit_l_min        -20

_diffrn_reflns_limit_l_max        21

_diffrn_reflns_theta_min          2.13

_diffrn_reflns_theta_max          27.00

_reflns_number_total              3448

_reflns_number_gt                 2465

_reflns_threshold_expression      >2sigma(I)

 

_computing_data_collection        'Bruker SMART'

_computing_cell_refinement        'Bruker SMART'

_computing_data_reduction         'Bruker SAINT'

_computing_structure_solution     'Bruker SHELXTL'

_computing_structure_refinement   'Bruker SHELXTL'

_computing_molecular_graphics     'Bruker SHELXTL'

_computing_publication_material   'Bruker SHELXTL'

 

_refine_special_details

;

 Refinement of F^2^ against ALL reflections.  The weighted R-factor wR and

 goodness of fit S are based on F^2^, conventional R-factors R are based

 on F, with F set to zero for negative F^2^. The threshold expression of

 F^2^ > 2sigma(F^2^) is used only for calculating R-factors(gt) etc. and is

 not relevant to the choice of reflections for refinement.  R-factors based

 on F^2^ are statistically about twice as large as those based on F, and R-

 factors based on ALL data will be even larger.

;

 

_refine_ls_structure_factor_coef  Fsqd

_refine_ls_matrix_type            full

_refine_ls_weighting_scheme       calc

_refine_ls_weighting_details

 'calc w=1/[\s^2^(Fo^2^)+(0.0489P)^2^+0.4955P] where P=(Fo^2^+2Fc^2^)/3'

_atom_sites_solution_primary      direct

_atom_sites_solution_secondary    difmap

_atom_sites_solution_hydrogens    geom

_refine_ls_hydrogen_treatment     refall

_refine_ls_extinction_method      none

_refine_ls_extinction_coef        ?

_refine_ls_number_reflns          3448

_refine_ls_number_parameters      264

_refine_ls_number_restraints      0

_refine_ls_R_factor_all           0.0688

_refine_ls_R_factor_gt            0.0433

_refine_ls_wR_factor_ref          0.1137

_refine_ls_wR_factor_gt           0.0976

_refine_ls_goodness_of_fit_ref    1.015

_refine_ls_restrained_S_all       1.015

_refine_ls_shift/su_max           0.000

_refine_ls_shift/su_mean          0.000

 

loop_

 _atom_site_label

 _atom_site_type_symbol

 _atom_site_fract_x

 _atom_site_fract_y

 _atom_site_fract_z

 _atom_site_U_iso_or_equiv

 _atom_site_adp_type

 _atom_site_occupancy

 _atom_site_symmetry_multiplicity

 _atom_site_calc_flag

 _atom_site_refinement_flags

 _atom_site_disorder_assembly

 _atom_site_disorder_group

S1 S 0.68049(6) 0.19798(6) 0.11544(3) 0.04344(18) Uani 1 1 d . . .

O1 O 0.99093(15) 1.00544(15) 0.22867(9) 0.0424(4) Uani 1 1 d . . .

O2 O 0.81717(16) 0.2574(2) 0.12324(12) 0.0684(5) Uani 1 1 d . . .

O3 O 0.6684(2) 0.06934(17) 0.07736(10) 0.0659(5) Uani 1 1 d . . .

O4 O 0.60931(16) 0.21071(17) 0.18594(9) 0.0510(4) Uani 1 1 d . . .

N1 N 0.78452(17) 0.90454(17) 0.26487(10) 0.0373(4) Uani 1 1 d . . .

N2 N 1.10064(17) 0.99968(17) 0.18209(10) 0.0352(4) Uani 1 1 d . . .

F1 F 0.58147(17) 0.43347(14) 0.07207(10) 0.0760(5) Uani 1 1 d . . .

F2 F 0.44895(14) 0.27217(16) 0.02937(10) 0.0748(5) Uani 1 1 d . . .

F3 F 0.63165(18) 0.31308(16) -0.02667(9) 0.0741(5) Uani 1 1 d . . .

B1 B 0.8915(2) 0.8994(2) 0.21354(15) 0.0361(5) Uani 1 1 d . . .

C1 C 0.6810(2) 0.8096(3) 0.25596(16) 0.0475(6) Uani 1 1 d . . .

C2 C 0.6779(2) 0.7119(3) 0.19976(16) 0.0509(6) Uani 1 1 d . . .

C3 C 0.7829(2) 0.7017(2) 0.14800(15) 0.0477(6) Uani 1 1 d . . .

C4 C 0.8913(2) 0.7903(2) 0.15227(14) 0.0399(5) Uani 1 1 d . . .

C5 C 0.7808(3) 1.0061(3) 0.32890(15) 0.0464(6) Uani 1 1 d . . .

C6 C 0.8656(3) 0.9661(3) 0.40668(17) 0.0570(7) Uani 1 1 d . . .

C7 C 1.0931(2) 1.0756(2) 0.11562(14) 0.0401(5) Uani 1 1 d . . .

C8 C 1.2044(2) 1.0742(2) 0.07170(15) 0.0446(5) Uani 1 1 d . . .

C9 C 1.3203(2) 0.9978(2) 0.09715(15) 0.0436(6) Uani 1 1 d . . .

C10 C 1.3221(2) 0.9215(2) 0.16575(14) 0.0446(5) Uani 1 1 d . . .

C11 C 1.2099(2) 0.9236(2) 0.20864(14) 0.0409(5) Uani 1 1 d . . .

C12 C 0.5807(2) 0.3084(2) 0.04388(15) 0.0450(5) Uani 1 1 d . . .

H1 H 0.615(3) 0.818(2) 0.2899(17) 0.062(8) Uiso 1 1 d . . .

H2 H 0.606(3) 0.653(2) 0.1983(14) 0.053(7) Uiso 1 1 d . . .

H3 H 0.782(2) 0.630(2) 0.1111(14) 0.046(7) Uiso 1 1 d . . .

H4 H 0.958(2) 0.778(2) 0.1189(14) 0.040(6) Uiso 1 1 d . . .

H5A H 0.688(3) 1.026(2) 0.3348(13) 0.047(6) Uiso 1 1 d . . .

H5B H 0.814(2) 1.089(2) 0.3095(15) 0.052(7) Uiso 1 1 d . . .

H6A H 0.829(3) 0.882(3) 0.4268(17) 0.072(9) Uiso 1 1 d . . .

H6B H 0.958(3) 0.949(3) 0.3987(17) 0.079(9) Uiso 1 1 d . . .

H6C H 0.863(3) 1.040(3) 0.4456(16) 0.061(8) Uiso 1 1 d . . .

H7 H 1.012(2) 1.125(2) 0.1048(13) 0.042(6) Uiso 1 1 d . . .

H8 H 1.199(2) 1.126(2) 0.0250(15) 0.056(7) Uiso 1 1 d . . .

H9 H 1.393(2) 0.998(2) 0.0676(14) 0.047(7) Uiso 1 1 d . . .

H10 H 1.397(2) 0.864(2) 0.1847(14) 0.052(7) Uiso 1 1 d . . .

H11 H 1.200(2) 0.875(2) 0.2546(15) 0.049(7) Uiso 1 1 d . . .

 

loop_

 _atom_site_aniso_label

 _atom_site_aniso_U_11

 _atom_site_aniso_U_22

 _atom_site_aniso_U_33

 _atom_site_aniso_U_23

 _atom_site_aniso_U_13

 _atom_site_aniso_U_12

S1 0.0381(3) 0.0544(4) 0.0375(3) -0.0065(3) 0.0032(2) 0.0135(2)

O1 0.0411(8) 0.0455(9) 0.0441(9) -0.0083(7) 0.0205(7) -0.0093(6)

O2 0.0294(8) 0.1068(15) 0.0686(13) -0.0112(11) 0.0041(8) 0.0081(9)

O3 0.1015(15) 0.0497(10) 0.0468(11) -0.0060(8) 0.0098(10) 0.0230(10)

O4 0.0467(9) 0.0704(11) 0.0368(9) -0.0050(8) 0.0093(7) 0.0126(8)

N1 0.0303(9) 0.0470(10) 0.0351(10) 0.0077(8) 0.0058(7) 0.0011(7)

N2 0.0345(9) 0.0391(10) 0.0338(10) -0.0045(7) 0.0117(7) -0.0042(7)

F1 0.0889(12) 0.0429(8) 0.0927(13) -0.0069(8) -0.0044(10) 0.0090(8)

F2 0.0468(8) 0.0855(11) 0.0851(12) 0.0296(9) -0.0223(8) -0.0131(8)

F3 0.0949(12) 0.0779(11) 0.0521(10) 0.0154(8) 0.0195(9) 0.0021(9)

B1 0.0327(12) 0.0395(13) 0.0358(13) 0.0073(10) 0.0034(10) 0.0007(10)

C1 0.0308(11) 0.0636(16) 0.0477(15) 0.0201(13) 0.0032(10) -0.0010(11)

C2 0.0365(12) 0.0555(15) 0.0584(16) 0.0134(13) -0.0044(11) -0.0126(11)

C3 0.0487(13) 0.0420(13) 0.0489(15) 0.0018(11) -0.0090(11) -0.0026(11)

C4 0.0391(12) 0.0409(12) 0.0396(13) 0.0038(10) 0.0039(10) 0.0011(9)

C5 0.0417(13) 0.0578(16) 0.0420(14) 0.0027(11) 0.0144(11) 0.0099(11)

C6 0.0599(18) 0.0684(19) 0.0426(15) -0.0027(14) 0.0055(13) 0.0071(14)

C7 0.0369(12) 0.0411(12) 0.0430(13) 0.0044(10) 0.0081(10) 0.0017(9)

C8 0.0478(13) 0.0485(14) 0.0392(13) 0.0054(11) 0.0125(11) -0.0033(10)

C9 0.0363(12) 0.0511(14) 0.0457(14) -0.0118(11) 0.0143(10) -0.0041(10)

C10 0.0383(12) 0.0498(14) 0.0453(14) -0.0055(11) 0.0035(10) 0.0048(10)

C11 0.0433(12) 0.0432(13) 0.0361(13) 0.0004(10) 0.0037(10) 0.0002(10)

C12 0.0429(12) 0.0445(13) 0.0472(14) -0.0006(11) 0.0042(10) -0.0037(10)

 

_geom_special_details

;

 All esds (except the esd in the dihedral angle between two l.s. planes)

 are estimated using the full covariance matrix.  The cell esds are taken

 into account individually in the estimation of esds in distances, angles

 and torsion angles; correlations between esds in cell parameters are only

 used when they are defined by crystal symmetry.  An approximate (isotropic)

 treatment of cell esds is used for estimating esds involving l.s. planes.

;

 

loop_

 _geom_bond_atom_site_label_1

 _geom_bond_atom_site_label_2

 _geom_bond_distance

 _geom_bond_site_symmetry_2

 _geom_bond_publ_flag

S1 O3 1.4288(18) . ?

S1 O4 1.4331(16) . ?

S1 O2 1.4368(18) . ?

S1 C12 1.815(2) . ?

O1 N2 1.383(2) . ?

O1 B1 1.429(3) . ?

N1 C1 1.371(3) . ?

N1 B1 1.414(3) . ?

N1 C5 1.474(3) . ?

N2 C11 1.332(3) . ?

N2 C7 1.337(3) . ?

F1 C12 1.331(3) . ?

F2 C12 1.316(3) . ?

F3 C12 1.326(3) . ?

B1 C4 1.492(3) . ?

C1 C2 1.349(4) . ?

C1 H1 0.91(3) . ?

C2 C3 1.408(4) . ?

C2 H2 0.91(2) . ?

C3 C4 1.363(3) . ?

C3 H3 0.94(2) . ?

C4 H4 0.90(2) . ?

C5 C6 1.505(4) . ?

C5 H5A 0.94(2) . ?

C5 H5B 0.96(2) . ?

C6 H6A 0.99(3) . ?

C6 H6B 0.93(3) . ?

C6 H6C 0.98(3) . ?

C7 C8 1.367(3) . ?

C7 H7 0.92(2) . ?

C8 C9 1.378(3) . ?

C8 H8 0.93(2) . ?

C9 C10 1.372(3) . ?

C9 H9 0.90(2) . ?

C10 C11 1.364(3) . ?

C10 H10 0.95(2) . ?

C11 H11 0.92(2) . ?

 

loop_

 _geom_angle_atom_site_label_1

 _geom_angle_atom_site_label_2

 _geom_angle_atom_site_label_3

 _geom_angle

 _geom_angle_site_symmetry_1

 _geom_angle_site_symmetry_3

 _geom_angle_publ_flag

O3 S1 O4 114.91(11) . . ?

O3 S1 O2 115.92(12) . . ?

O4 S1 O2 114.22(11) . . ?

O3 S1 C12 103.98(11) . . ?

O4 S1 C12 102.57(10) . . ?

O2 S1 C12 102.76(11) . . ?

N2 O1 B1 114.28(15) . . ?

C1 N1 B1 118.8(2) . . ?

C1 N1 C5 118.3(2) . . ?

B1 N1 C5 122.86(19) . . ?

C11 N2 C7 124.28(19) . . ?

C11 N2 O1 117.64(17) . . ?

C7 N2 O1 118.00(17) . . ?

N1 B1 O1 112.82(19) . . ?

N1 B1 C4 119.8(2) . . ?

O1 B1 C4 127.4(2) . . ?

C2 C1 N1 122.1(2) . . ?

C2 C1 H1 122.6(17) . . ?

N1 C1 H1 115.3(17) . . ?

C1 C2 C3 121.2(2) . . ?

C1 C2 H2 116.3(16) . . ?

C3 C2 H2 122.5(16) . . ?

C4 C3 C2 121.5(2) . . ?

C4 C3 H3 118.3(14) . . ?

C2 C3 H3 120.1(14) . . ?

C3 C4 B1 116.6(2) . . ?

C3 C4 H4 118.4(14) . . ?

B1 C4 H4 125.0(14) . . ?

N1 C5 C6 112.7(2) . . ?

N1 C5 H5A 109.0(14) . . ?

C6 C5 H5A 113.6(14) . . ?

N1 C5 H5B 108.2(15) . . ?

C6 C5 H5B 110.7(15) . . ?

H5A C5 H5B 102.0(19) . . ?

C5 C6 H6A 109.8(16) . . ?

C5 C6 H6B 111.0(18) . . ?

H6A C6 H6B 106(2) . . ?

C5 C6 H6C 108.6(15) . . ?

H6A C6 H6C 112(2) . . ?

H6B C6 H6C 109(2) . . ?

N2 C7 C8 117.8(2) . . ?

N2 C7 H7 115.2(14) . . ?

C8 C7 H7 127.0(14) . . ?

C7 C8 C9 120.0(2) . . ?

C7 C8 H8 118.0(15) . . ?

C9 C8 H8 122.0(15) . . ?

C10 C9 C8 119.7(2) . . ?

C10 C9 H9 121.2(15) . . ?

C8 C9 H9 119.1(15) . . ?

C11 C10 C9 119.6(2) . . ?

C11 C10 H10 117.0(14) . . ?

C9 C10 H10 123.4(14) . . ?

N2 C11 C10 118.7(2) . . ?

N2 C11 H11 114.8(14) . . ?

C10 C11 H11 126.5(15) . . ?

F2 C12 F3 107.1(2) . . ?

F2 C12 F1 106.70(19) . . ?

F3 C12 F1 107.02(19) . . ?

F2 C12 S1 112.45(16) . . ?

F3 C12 S1 112.44(16) . . ?

F1 C12 S1 110.76(16) . . ?

 

loop_

 _geom_torsion_atom_site_label_1

 _geom_torsion_atom_site_label_2

 _geom_torsion_atom_site_label_3

 _geom_torsion_atom_site_label_4

 _geom_torsion

 _geom_torsion_site_symmetry_1

 _geom_torsion_site_symmetry_2

 _geom_torsion_site_symmetry_3

 _geom_torsion_site_symmetry_4

 _geom_torsion_publ_flag

B1 O1 N2 C11 -85.5(2) . . . . ?

B1 O1 N2 C7 97.7(2) . . . . ?

C1 N1 B1 O1 179.08(18) . . . . ?

C5 N1 B1 O1 -2.2(3) . . . . ?

C1 N1 B1 C4 -1.2(3) . . . . ?

C5 N1 B1 C4 177.53(19) . . . . ?

N2 O1 B1 N1 177.08(16) . . . . ?

N2 O1 B1 C4 -2.6(3) . . . . ?

B1 N1 C1 C2 -0.1(3) . . . . ?

C5 N1 C1 C2 -178.9(2) . . . . ?

N1 C1 C2 C3 0.9(4) . . . . ?

C1 C2 C3 C4 -0.3(4) . . . . ?

C2 C3 C4 B1 -0.9(3) . . . . ?

N1 B1 C4 C3 1.7(3) . . . . ?

O1 B1 C4 C3 -178.6(2) . . . . ?

C1 N1 C5 C6 93.1(3) . . . . ?

B1 N1 C5 C6 -85.6(3) . . . . ?

C11 N2 C7 C8 0.5(3) . . . . ?

O1 N2 C7 C8 177.14(18) . . . . ?

N2 C7 C8 C9 -1.0(3) . . . . ?

C7 C8 C9 C10 1.2(3) . . . . ?

C8 C9 C10 C11 -0.9(3) . . . . ?

C7 N2 C11 C10 -0.2(3) . . . . ?

O1 N2 C11 C10 -176.87(18) . . . . ?

C9 C10 C11 N2 0.4(3) . . . . ?

O3 S1 C12 F2 60.0(2) . . . . ?

O4 S1 C12 F2 -59.97(19) . . . . ?

O2 S1 C12 F2 -178.74(17) . . . . ?

O3 S1 C12 F3 -60.99(19) . . . . ?

O4 S1 C12 F3 178.99(16) . . . . ?

O2 S1 C12 F3 60.22(18) . . . . ?

O3 S1 C12 F1 179.33(17) . . . . ?

O4 S1 C12 F1 59.31(19) . . . . ?

O2 S1 C12 F1 -59.46(19) . . . . ?

 

_diffrn_measured_fraction_theta_max    0.989

_diffrn_reflns_theta_full              27.00

_diffrn_measured_fraction_theta_full   0.989

_refine_diff_density_max    0.280

_refine_diff_density_min   -0.269

_refine_diff_density_rms    0.043
